# Supplementary figures and images for: Early radiological response evaluation with response evaluation criteria in solid tumors 1.1 stratifies survival in hepatocellular carcinoma patients treated with lenvatinib
Source: PubMed Central journal article supplement — JGH Open. 2020 Oct 16;4(6):1183–90. doi: 10.1002/jgh3.12420 (PMC7731835; doi:10.1002/jgh3.12420), 2020-10-16

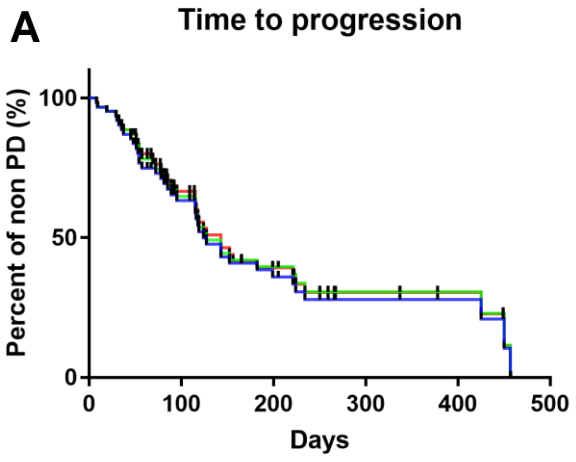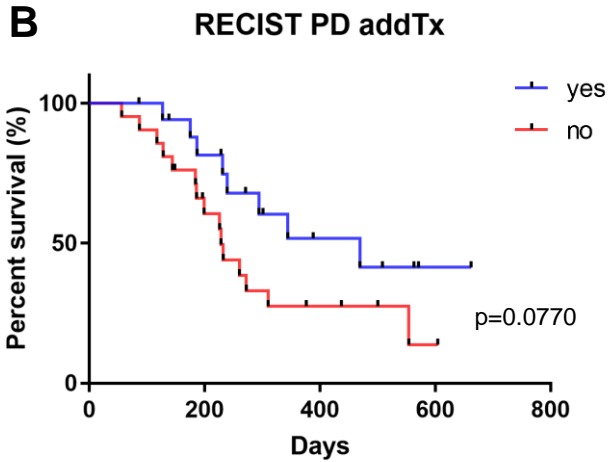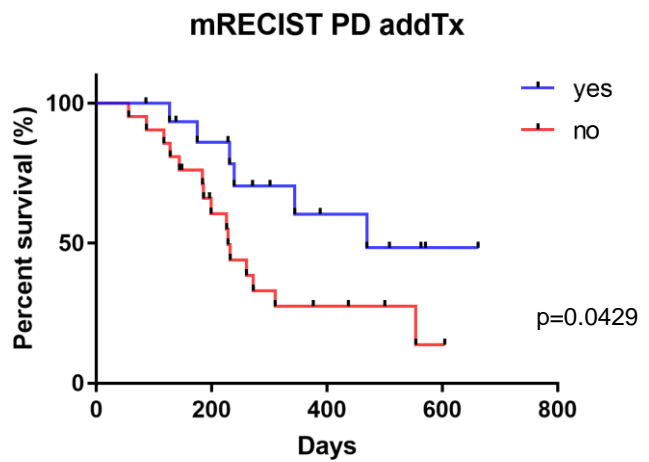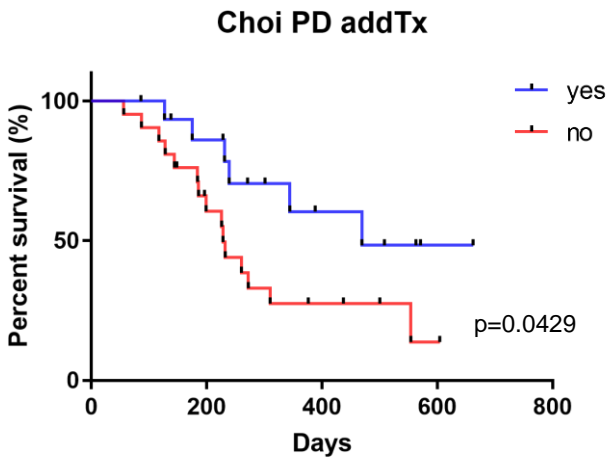

Supplement: JGH3-4-1183-s001.pdf [file JGH3-4-1183-s001.pdf]
